# Supplementary material for: Age, Neuropathology, and Dementia
Source: Atypon-hosted journal article supplement (doi:10.1056/nejmoa0806142), 2009-05-27
Supplement: nejm_savva_2302sa1.pdf [file nejm_savva_2302sa1.pdf]

## Supplementary Appendix

This appendix has been provided by the authors to give readers additional information about their work.

Supplement to: Savva GM, Wharton SB, Ince PG, et al. Age, neuropathology, and dementia. *N Engl J Med* 2009;360:2302-9.

Supplementary table 1 - Distribution of pathological lesions according to age at death in 426 brains with known dementia status. Column totals are shown in table 1.

|                                  |          | <80         |      |          |      | 80-84       |      |          |      | 85-89       |      |          |      | 90-94       |      |          |      | >94         |      |          |      | Total       |      |          |      |
|----------------------------------|----------|-------------|------|----------|------|-------------|------|----------|------|-------------|------|----------|------|-------------|------|----------|------|-------------|------|----------|------|-------------|------|----------|------|
|                                  |          | No dementia |      | Dementia |      | No dementia |      | Dementia |      | No dementia |      | Dementia |      | No dementia |      | Dementia |      | No dementia |      | Dementia |      | No dementia |      | Dementia |      |
|                                  |          | N           | %    | N        | %    | N           | %    | N        | %    | N           | %    | N        | %    | N           | %    | N        | %    | N           | %    | N        | %    | N           | %    | N        | %    |
| Cortical atrophy<br>Hippocampus  | None     | 41          | 75.9 | 10       | 45.5 | 22          | 68.8 | 12       | 33.3 | 25          | 62.5 | 19       | 29.7 | 22          | 66.7 | 19       | 35.2 | 7           | 70   | 11       | 28.9 | 117         | 69.2 | 71       | 33.2 |
|                                  | Mild     | 9           | 16.7 | 4        | 18.2 | 8           | 25   | 10       | 27.8 | 8           | 20   | 17       | 26.6 | 8           | 24.2 | 10       | 18.5 |             |      | 6        | 15.8 | 33          | 19.5 | 47       | 22   |
|                                  | Moderate | 4           | 7.4  | 8        | 36.4 | 2           | 6.3  | 12       | 33.3 | 6           | 15   | 21       | 32.8 | 2           | 6.1  | 20       | 37   | 3           | 30   | 17       | 44.7 | 17          | 10.1 | 78       | 36.4 |
|                                  | Severe   |             |      |          |      |             |      | 2        | 5.6  | 1           | 2.5  | 7        | 10.9 | 1           | 3    | 5        | 9.3  |             |      | 4        | 10.5 | 2           | 1.18 | 18       | 8.41 |
|                                  | Missing  | 3           |      | 3        |      | 3           |      | 4        |      | 4           |      | 6        |      | 2           |      | 9        |      | 2           |      | 7        |      | 14          |      | 29       |      |
| Cortical atrophy<br>Neocortex    | None     | 39          | 69.6 | 10       | 41.7 | 17          | 51.5 | 10       | 25   | 22          | 52.4 | 16       | 23.9 | 18          | 52.9 | 13       | 22   | 5           | 41.7 | 8        | 19.5 | 101         | 57.1 | 57       | 24.7 |
|                                  | Mild     | 13          | 23.2 | 6        | 25   | 11          | 33.3 | 13       | 32.5 | 11          | 26.2 | 15       | 22.4 | 12          | 35.3 | 13       | 22   | 4           | 33.3 | 5        | 12.2 | 51          | 28.8 | 52       | 22.5 |
|                                  | Moderate | 4           | 7.1  | 8        | 33.3 | 5           | 15.2 | 12       | 30   | 8           | 19   | 26       | 38.8 | 4           | 11.8 | 25       | 42.4 | 3           | 25   | 23       | 56.1 | 24          | 13.6 | 94       | 40.7 |
|                                  | Severe   |             |      |          |      |             |      | 5        | 12.5 | 1           | 2.4  | 10       | 14.9 |             |      | 8        | 13.6 |             |      | 5        | 12.2 | 1           | 0.56 | 28       | 12.1 |
|                                  | Missing  | 1           |      | 1        |      | 2           |      | 0        |      | 2           |      | 3        |      | 1           |      | 4        |      | 0           |      | 4        |      | 6           |      | 12       |      |
| Lewy bodies<br>Entorhinal cortex | None     | 57          | 100  | 21       | 87.5 | 34          | 100  | 33       | 94.3 | 41          | 97.6 | 60       | 93.8 | 34          | 100  | 52       | 88.1 | 8           | 88.9 | 41       | 100  | 174         | 98.9 | 207      | 92.8 |
|                                  | Mild     |             |      | 3        | 12.5 |             |      | 2        | 5.7  | 1           | 2.4  | 2        | 3.1  |             |      | 4        | 6.8  | 1           | 11.1 |          |      | 2           | 1.14 | 11       | 4.93 |
|                                  | Moderate |             |      |          |      |             |      |          |      |             |      | 2        | 3.1  |             |      | 2        | 3.4  |             |      |          |      | 0           | 0    | 4        | 1.79 |
|                                  | Severe   |             |      |          |      |             |      |          |      |             |      |          |      |             |      | 1        | 1.7  |             |      |          |      | 0           | 0    | 1        | 0.45 |
|                                  | Missing  | 0           |      | 1        |      | 1           |      | 5        |      | 2           |      | 6        |      | 1           |      | 4        |      | 3           |      | 4        |      | 7           |      | 20       |      |
| Lewy bodies<br>Hippocampus       | None     | 57          | 100  | 22       | 91.7 | 35          | 100  | 38       | 100  | 43          | 100  | 64       | 95.5 | 34          | 100  | 58       | 98.3 | 9           | 100  | 43       | 100  | 178         | 100  | 225      | 97.4 |
|                                  | Mild     |             |      | 2        | 8.3  |             |      |          |      |             |      | 3        | 4.5  |             |      | 1        | 1.7  |             |      |          |      | 0           | 0    | 6        | 2.6  |
|                                  | Missing  | 0           |      | 1        |      | 0           |      | 2        |      | 1           |      | 3        |      | 1           |      | 4        |      | 3           |      | 2        |      | 5           |      | 12       |      |
| Lewy bodies<br>Neocortex         | None     | 54          | 98.2 | 22       | 88   | 34          | 100  | 36       | 94.7 | 44          | 100  | 65       | 92.9 | 33          | 100  | 53       | 88.3 | 11          | 100  | 44       | 100  | 176         | 99.4 | 220      | 92.8 |
|                                  | Mild     | 1           | 1.8  | 3        | 12   |             |      | 2        | 5.3  |             |      | 5        | 7.1  |             |      | 7        | 11.7 |             |      |          |      | 1           | 0.56 | 17       | 7.17 |
|                                  | Missing  | 2           |      | 0        |      | 1           |      | 2        |      | 0           |      | 0        |      | 2           |      | 3        |      | 1           |      | 1        |      | 6           |      | 6        |      |



|                             |             | <80         |      |          |      | 80-84       |      |          |      | 85-89       |      |          |      | 90-94       |      |          |      | >94         |      |          |      | Total       |      |          |      |
|-----------------------------|-------------|-------------|------|----------|------|-------------|------|----------|------|-------------|------|----------|------|-------------|------|----------|------|-------------|------|----------|------|-------------|------|----------|------|
|                             |             | No dementia |      | Dementia |      | No dementia |      | Dementia |      | No dementia |      | Dementia |      | No dementia |      | Dementia |      | No dementia |      | Dementia |      | No dementia |      | Dementia |      |
|                             |             | N           | %    | N        | %    | N           | %    | N        | %    | N           | %    | N        | %    | N           | %    | N        | %    | N           | %    | N        | %    | N           | %    | N        | %    |
| Tangles                     | None        | 16          | 28.6 | 2        | 8.3  | 2           | 5.9  | 2        | 5.3  | 3           | 6.8  | 2        | 3    | 4           | 11.4 |          |      | 2           | 16.7 | 1        | 2.3  | 27          | 14.9 | 7        | 2.98 |
| Entorhinal cortex           | Mild        | 19          | 33.9 | 5        | 20.8 | 12          | 35.3 | 1        | 2.6  | 12          | 27.3 | 13       | 19.4 | 8           | 22.9 | 8        | 12.9 | 4           | 33.3 | 3        | 6.8  | 55          | 30.4 | 30       | 12.8 |
|                             | Moderate    | 16          | 28.6 | 6        | 25   | 15          | 44.1 | 19       | 50   | 24          | 54.5 | 27       | 40.3 | 17          | 48.6 | 24       | 38.7 | 5           | 41.7 | 22       | 50   | 77          | 42.5 | 98       | 41.7 |
|                             | Severe      | 5           | 8.9  | 11       | 45.8 | 5           | 14.7 | 16       | 42.1 | 5           | 11.4 | 25       | 37.3 | 6           | 17.1 | 30       | 48.4 | 1           | 8.3  | 18       | 40.9 | 22          | 12.2 | 100      | 42.6 |
|                             | Missing     | 1           |      | 1        |      | 1           |      | 2        |      | 0           |      | 3        |      | 0           |      | 1        |      | 0           |      | 1        |      | 2           |      | 8        |      |
|                             | Tangles     | None        | 20   | 35.7     | 4    | 16.7        | 2    | 5.7      | 2    | 5           | 5    | 11.4     | 4    | 5.8         | 4    | 11.4     | 1    | 1.6         | 3    | 25       | 1    | 2.3         | 34   | 18.7     | 12   |
| Hippocampus                 | Mild        | 22          | 39.3 | 3        | 12.5 | 17          | 48.6 | 4        | 10   | 16          | 36.4 | 15       | 21.7 | 12          | 34.3 | 8        | 13.1 | 1           | 8.3  | 9        | 20.5 | 68          | 37.4 | 39       | 16.4 |
|                             | Moderate    | 11          | 19.6 | 5        | 20.8 | 10          | 28.6 | 13       | 32.5 | 17          | 38.6 | 22       | 31.9 | 11          | 31.4 | 15       | 24.6 | 4           | 33.3 | 17       | 38.6 | 53          | 29.1 | 72       | 30.3 |
|                             | Severe      | 3           | 5.4  | 12       | 50   | 6           | 17.1 | 21       | 52.5 | 6           | 13.6 | 28       | 40.6 | 8           | 22.9 | 37       | 60.7 | 4           | 33.3 | 17       | 38.6 | 27          | 14.8 | 115      | 48.3 |
|                             | Missing     | 1           |      | 1        |      | 0           |      | 0        |      | 0           |      | 1        |      | 0           |      | 2        |      | 0           |      | 1        |      | 1           |      | 5        |      |
|                             | Tangles     | None        | 45   | 80.4     | 9    | 36          | 19   | 54.3     | 9    | 22.5        | 24   | 55.8     | 26   | 37.1        | 19   | 54.3     | 22   | 34.9        | 7    | 58.3     | 15   | 33.3        | 114  | 63       | 81   |
| Neocortex                   | Mild        | 11          | 19.6 | 4        | 16   | 14          | 40   | 13       | 32.5 | 14          | 32.6 | 20       | 28.6 | 16          | 45.7 | 9        | 14.3 | 4           | 33.3 | 17       | 37.8 | 59          | 32.6 | 63       | 25.9 |
|                             | Moderate    |             |      | 6        | 24   | 2           | 5.7  | 10       | 25   | 5           | 11.6 | 11       | 15.7 |             |      | 26       | 41.3 | 1           | 8.3  | 7        | 15.6 | 8           | 4.42 | 60       | 24.7 |
|                             | Severe      |             |      | 6        | 24   |             |      | 8        | 20   |             |      | 13       | 18.6 |             |      | 6        | 9.5  |             |      | 6        | 13.3 | 0           | 0    | 39       | 16   |
|                             | Missing     | 1           |      | 0        |      | 0           |      | 0        |      | 1           |      | 0        |      | 0           |      | 0        |      | 0           |      | 0        |      | 2           |      | 0        |      |
|                             | Haemorrhage | Absent      | 54   | 96.4     | 23   | 95.8        | 30   | 90.9     | 36   | 97.3        | 37   | 92.5     | 63   | 94          | 33   | 97.1     | 57   | 96.6        | 11   | 100      | 41   | 97.6        | 165  | 94.8     | 220  |
|                             | Present     | 2           | 3.6  | 1        | 4.2  | 3           | 9.1  | 1        | 2.7  | 3           | 7.5  | 4        | 6    | 1           | 2.9  | 2        | 3.4  |             |      | 1        | 2.4  | 9           | 5.17 | 9        | 3.93 |
|                             | Missing     | 1           |      | 1        |      | 2           |      | 3        |      | 4           |      | 3        |      | 1           |      | 4        |      | 1           |      | 3        |      | 9           |      | 14       |      |
| Infarct                     | Absent      | 47          | 82.5 | 13       | 54.2 | 23          | 69.7 | 25       | 64.1 | 32          | 76.2 | 41       | 60.3 | 21          | 61.8 | 46       | 74.2 | 11          | 100  | 31       | 72.1 | 134         | 75.7 | 156      | 66.1 |
|                             | Present     | 10          | 17.5 | 11       | 45.8 | 10          | 30.3 | 14       | 35.9 | 10          | 23.8 | 27       | 39.7 | 13          | 38.2 | 16       | 25.8 |             |      | 12       | 27.9 | 43          | 24.3 | 80       | 33.9 |
|                             | Missing     | 0           |      | 1        |      | 2           |      | 1        |      | 2           |      | 2        |      | 1           |      | 1        |      | 1           |      | 2        |      | 6           |      | 7        |      |
| Lacune                      | Absent      | 45          | 78.9 | 18       | 75   | 28          | 87.5 | 30       | 78.9 | 37          | 88.1 | 50       | 72.5 | 28          | 82.4 | 47       | 75.8 | 8           | 72.7 | 28       | 66.7 | 146         | 83   | 173      | 73.6 |
|                             | Present     | 12          | 21.1 | 6        | 25   | 4           | 12.5 | 8        | 21.1 | 5           | 11.9 | 19       | 27.5 | 6           | 17.6 | 15       | 24.2 | 3           | 27.3 | 14       | 33.3 | 30          | 17   | 62       | 26.4 |
|                             | Missing     | 0           |      | 1        |      | 3           |      | 2        |      | 2           |      | 1        |      | 1           |      | 1        |      | 1           |      | 3        |      | 7           |      | 8        |      |
| Multiple vascular pathology | Absent      | 44          | 77.2 | 14       | 56   | 26          | 74.3 | 27       | 67.5 | 30          | 68.2 | 35       | 50   | 24          | 68.6 | 38       | 60.3 | 9           | 75   | 27       | 60   | 133         | 72.7 | 141      | 58   |
|                             | Present     | 13          | 22.8 | 11       | 44   | 9           | 25.7 | 13       | 32.5 | 14          | 31.8 | 35       | 50   | 11          | 31.4 | 25       | 39.7 | 3           | 25   | 18       | 40   | 50          | 27.3 | 102      | 42   |
|                             | Missing     | 0           |      | 0        |      | 0           |      | 0        |      | 0           |      | 0        |      | 0           |      | 0        |      | 0           |      | 0        |      | 0           |      | 0        |      |
| Small vessel Disease        | Absent      | 22          | 41.5 | 5        | 21.7 | 15          | 48.4 | 9        | 26.5 | 18          | 41.9 | 15       | 22.4 | 11          | 31.4 | 12       | 19.4 | 3           | 27.3 | 11       | 25   | 69          | 39.9 | 52       | 22.6 |
|                             | Present     | 31          | 58.5 | 18       | 78.3 | 16          | 51.6 | 25       | 73.5 | 25          | 58.1 | 52       | 77.6 | 24          | 68.6 | 50       | 80.6 | 8           | 72.7 | 33       | 75   | 104         | 60.1 | 178      | 77.4 |
|                             | Missing     | 4           |      | 2        |      | 4           |      | 6        |      | 1           |      | 3        |      | 0           |      | 1        |      | 1           |      | 1        |      | 10          |      | 13       |      |

Supplementary table 2 – Sensitivity analysis of the odds ratios for the associations between neuropathological features and dementia

|                    |                             | At age 75 years at death |                                |                                               |                                       | At age 95 years at death |                                |                                               |                                       |
|--------------------|-----------------------------|--------------------------|--------------------------------|-----------------------------------------------|---------------------------------------|--------------------------|--------------------------------|-----------------------------------------------|---------------------------------------|
|                    |                             | Primary analysis         | <sup>1</sup> Recently assessed | <sup>2</sup> Adjusted for demographic factors | <sup>3</sup> Prevalent cases excluded | Primary analysis         | <sup>1</sup> Recently assessed | <sup>2</sup> Adjusted for demographic factors | <sup>3</sup> Prevalent cases excluded |
| Tangles            | Hippocampus                 | 8.6                      | 8.6                            | 7.8                                           | 12.1                                  | 2.1                      | 2.3                            | 2.0                                           | 1.8                                   |
|                    | Neocortex                   | 35.2                     | 31.6                           | 31.2                                          | 48.8                                  | 7.4                      | 9.3                            | 7.3                                           | 5.4                                   |
|                    | Entorhinal Cortex           | 4.7                      | 3.5                            | 4.5                                           | 7.1                                   | 2.9                      | 3.0                            | 2.7                                           | 2.6                                   |
| Neuritic Plaques   | Hippocampus                 | 8.6                      | 5.6                            | 7.8                                           | 10.4                                  | 2.5                      | 3.0                            | 2.4                                           | 2.0                                   |
|                    | Neocortex                   | 10.2                     | 10.5                           | 9.1                                           | 13.1                                  | 1.4                      | 1.9                            | 1.4                                           | 1.1                                   |
|                    | Entorhinal Cortex           | 7.2                      | 7.5                            | 6.6                                           | 8.8                                   | 2.3                      | 2.0                            | 2.2                                           | 1.8                                   |
| Diffuse Plaques    | Hippocampus                 | 2.4                      | 2.2                            | 2.3                                           | 2.9                                   | 2.1                      | 1.7                            | 2.1                                           | 1.6                                   |
|                    | Neocortex                   | 2.7                      | 1.7                            | 2.8                                           | 3.4                                   | 1.8                      | 2.4                            | 1.9                                           | 1.4                                   |
|                    | Entorhinal Cortex           | 2.9                      | 3.4                            | 2.9                                           | 3.9                                   | 1.2                      | 1.3                            | 1.1                                           | 1.0                                   |
| Cortical atrophy   | Hippocampus                 | 8.0                      | 13.2                           | 7.5                                           | 11.4                                  | 4.2                      | 6.4                            | 3.9                                           | 3.1                                   |
|                    | Neocortex                   | 5.1                      | 17.0                           | 4.9                                           | 6.1                                   | 6.1                      | 7.5                            | 6.0                                           | 5.4                                   |
| Vascular pathology | Multiple vascular pathology | 2.4                      | 1.9                            | 2.1                                           | 2.4                                   | 1.6                      | 2.3                            | 1.6                                           | 1.5                                   |
|                    | Infarcts                    | 2.9                      | 3.0                            | 2.7                                           | 2.4                                   | 1.1                      | 0.8                            | 1.0                                           | 1.1                                   |
|                    | Haemorrhage                 | 0.9                      | 0.6                            | 0.6                                           | 0.9                                   | 0.7                      | 0.4                            | 0.6                                           | 1.1                                   |
|                    | Lacune                      | 1.4                      | 0.6                            | 1.5                                           | 1.7                                   | 2.0                      | 7.1                            | 2.4                                           | 1.8                                   |
|                    | Small vessel disease        | 2.7                      | 2.5                            | 2.5                                           | 3.0                                   | 1.8                      | 2.7                            | 1.8                                           | 1.6                                   |

<sup>1</sup> Includes only the 173 participants assessed within one year of death

<sup>2</sup> Association adjusted for sex, social class, and the time between last assessment and death

<sup>3</sup> Includes only the 400 participants without dementia at baseline

### *Supplementary Appendix - Diagnosis of Dementia*

Dementia status at death for each participant was determined by synthesis of all information available including assessments during the last years of life, informant interview after death where this was possible and death certification.

A study diagnosis of dementia was made if: dementia was present at any assessment, based on the full GMS AGE-CAT diagnostic algorithm equivalent to DSM-III-R (N=188), if dementia was noted on their death certificate (N=20) (unpublished work within CFAS shows that dementia is noted on a death certificate only when it is present in life), or if a detailed retrospective interview with a knowledgeable informant, covering the diagnostic domains required for clinical diagnosis including separation from terminal decline, indicated that dementia was present (N=21).

Participants were considered to have died without dementia if they did not have dementia at their last interview and that interview had been conducted less than six months before death (N=35) or if they did not have dementia at their last interview and the retrospective interview had indicated no dementia at death (N=75).

In individuals where the time since assessment to death was over 6 months and where there was no clear diagnosis possible from a retrospective interview a Bayesian analysis of the probability of dementia was undertaken that modelled the entire cognitive history of an individual. This analysis was combined with all other available information to generate the study diagnosis. This method has been shown to be 94% sensitive and 95% specific to dementia (Matthews 2004). Using this technique it was determined that 73 participants did not have dementia at death, and 14 did have dementia at death. In 30 cases insufficient information close to time of death was available for a reliable clinical diagnosis at the end of life to be made, and these cases were excluded from all analyses.

Matthews FE. Incidence estimation in studies of two-phase two-wave design. A case-control study using the Medical Research Council Cognitive Function and Ageing Study. (PhD Thesis. Cambridge, UK: University of Cambridge, 2004)
